# Supplementary material
Source: PubMed Central journal article supplement (PMC536048)

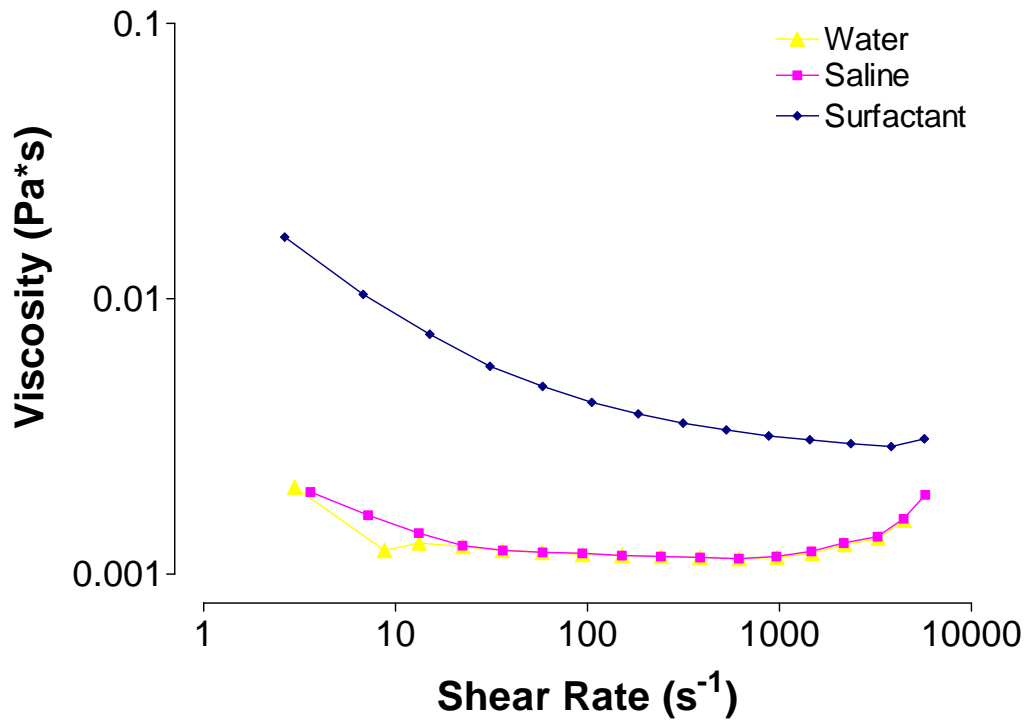

Supplement: pnas_101_50_17383__3.pdf [file pnas_101_50_17383__3.pdf]

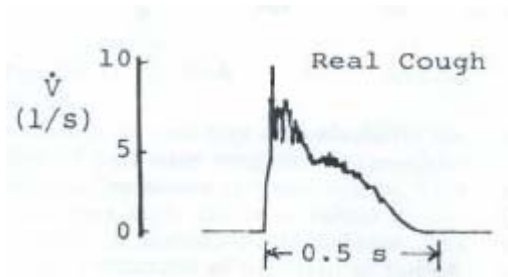

a

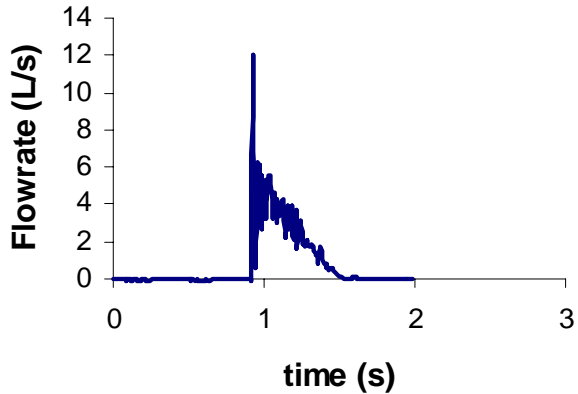

b

Supplement: pnas_101_50_17383__4.pdf [file pnas_101_50_17383__4.pdf]

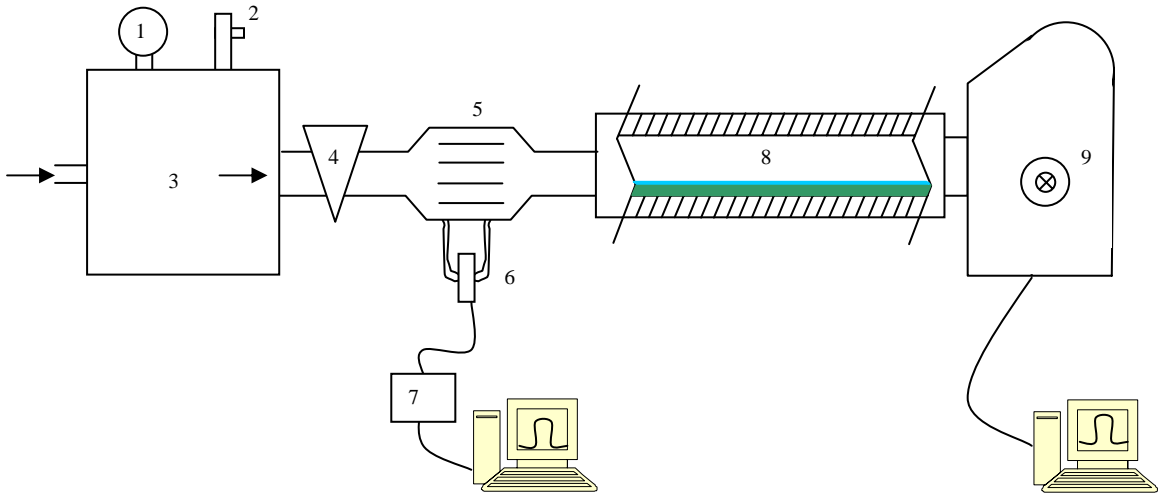

Supplement: pnas_101_50_17383__5.pdf [file pnas_101_50_17383__5.pdf]

# Viscoelastic Fingerprint of Mucus Mimetic

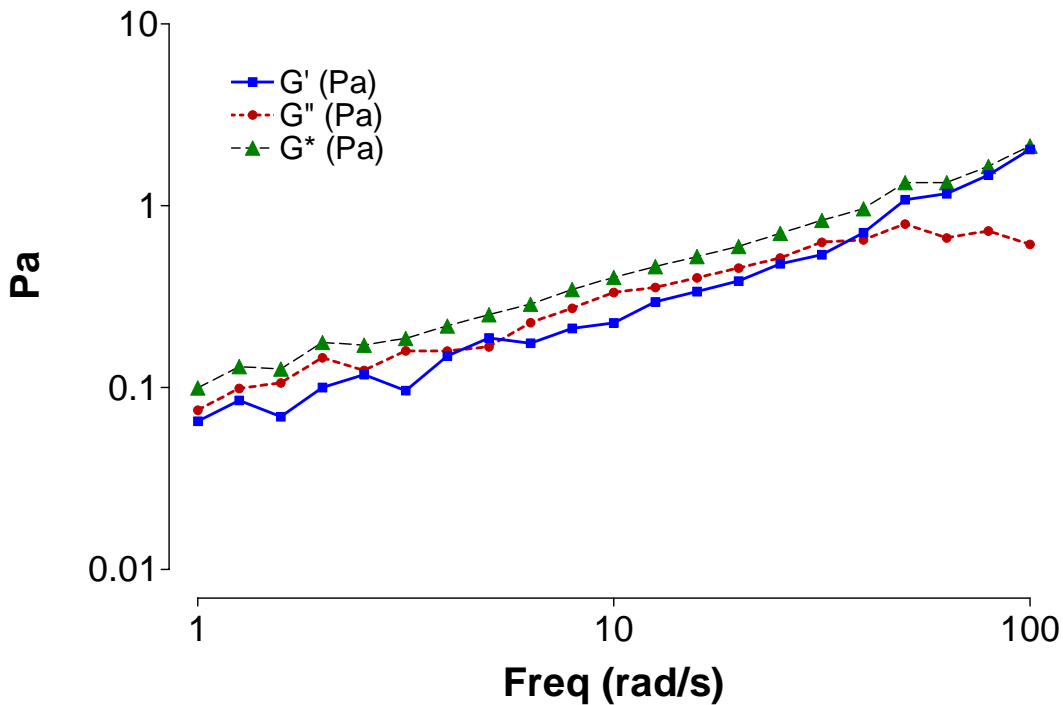

Supplement: pnas_101_50_17383__6.pdf [file pnas_101_50_17383__6.pdf]
